# Supplementary material
Source: Springer Nature journal article supplement (https://www.springermedizin.de/resource/supplementary/12936_2010_1329_MOESM2_ESM.pdf/9549532)
Supplement: MOESM2 [file 9549532]

**A****Olyset**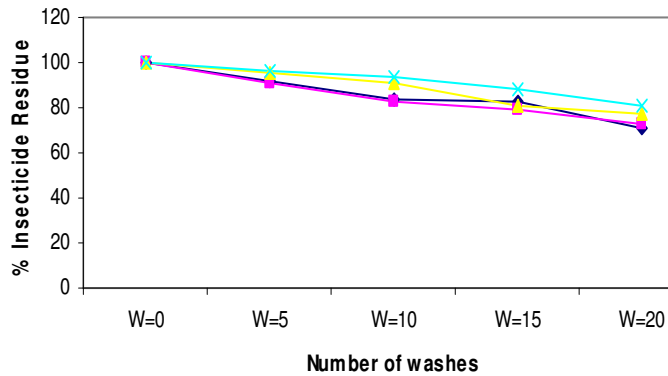

◆ Sun/Hang    ■ Sun/Grnd    ▲ Shade/Grnd    × Shade/Hang

**B****PermaNet**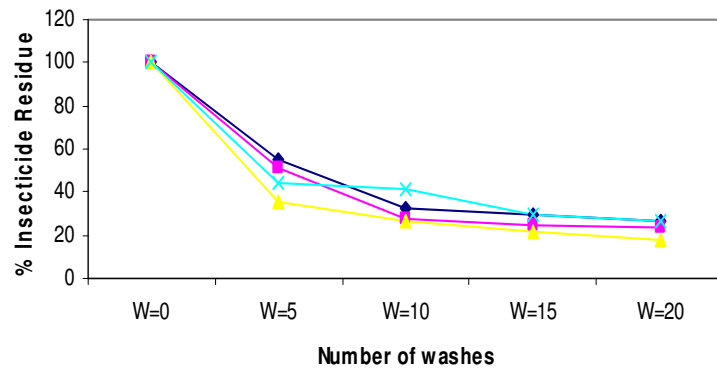

◆ Sun/Hang    ■ Sun/Grnd    ▲ Shade/Grnd    × Shade/Hang

**C****BASF**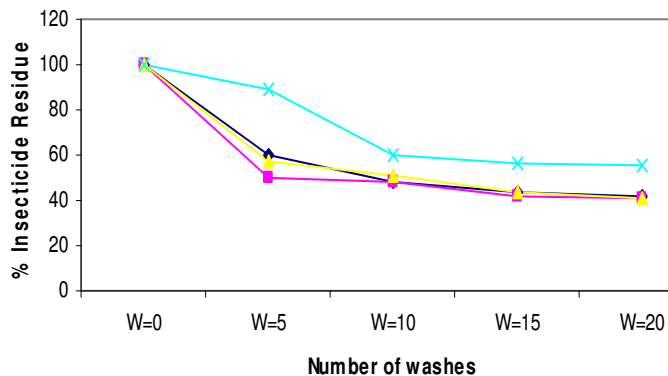

◆ Sun/Hang    ■ Sun/Grnd    ▲ Shade/Grnd    × Shade/Hang

**D****TNT**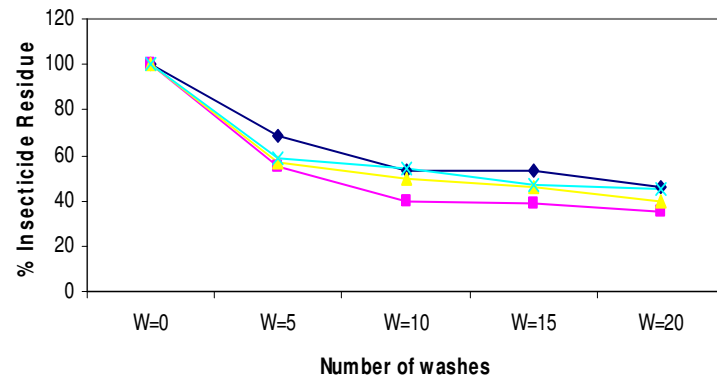

◆ Sun/Hang    ■ Sun/Grnd    ▲ Shade/Grnd    × Shade/Hang
